# Supplementary material
Source: Springer Nature journal article supplement (https://www.springermedizin.de/resource/supplementary/12943_2014_1439_MOESM1_ESM.pdf/9552984)

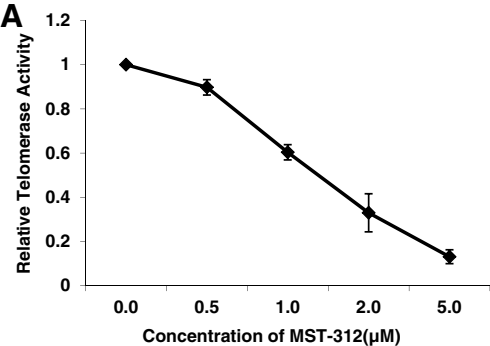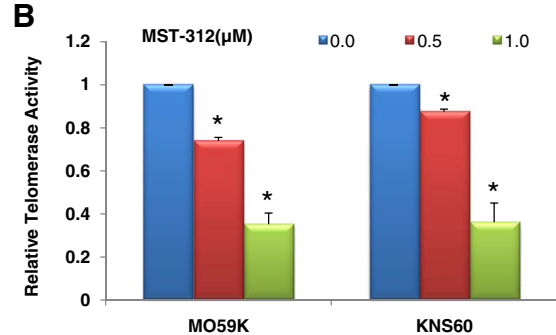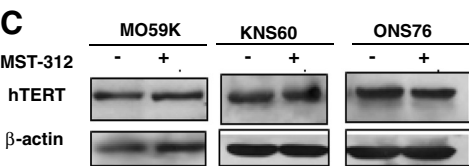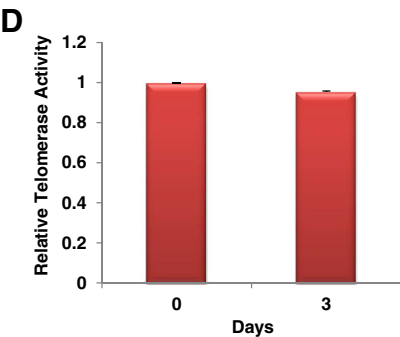

**E**

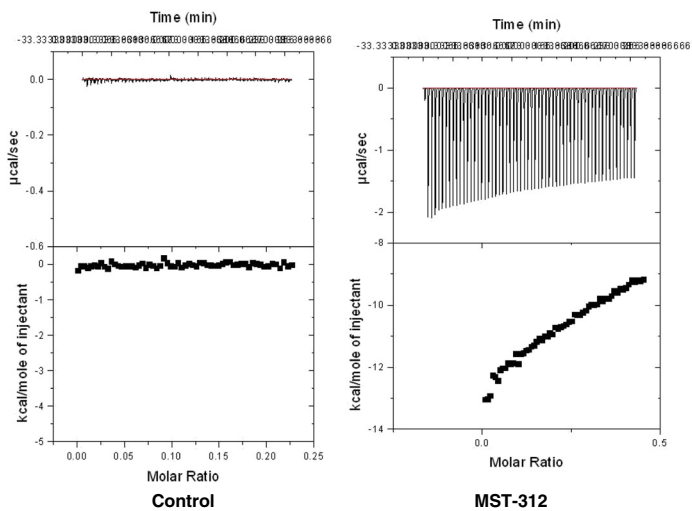

Supplement: MOESM1 [file 9552984]
